# Supplementary material for: Molecular evolution of umami/sweet taste receptor genes in reptiles
Source: PubMed Central journal article supplement (PMC6110252; doi:10.7717/peerj.5570), 2018-08-24
Supplement: peerj-06-5570-s001.pdf [file peerj-06-5570-s001.pdf]

*Tas1r2* Exon 2

Human (292) 5' ATCGTGGATGTGTGCTACATCTCC**AACAATGTC**CAGCCGGTGCTCTACTTCCTGGCACAC 3'  
common garter snake 5' ATGATGGATATCTGCTTCCTCACC**AA-----**CACCCCATCTGCATTTCTCGCTGAC 3'

*Tas1r2* Exon 3

Human (910) 5' TGGGCCATCGACCCGGTCCCTGCACAACCTC**AC**GGAGCTGCGCCACTTGGGCACCTTCCTG 3'  
king cobra 5' TGGGCTGCTGACCTGTCCATCCACGGCCTC**TGCA**ACATTTCCAGGCTGGGAGACGTATTTG 3'

*Tas1r2* Exon 6

Human (1840) 5' GCATACATGGTG**GTCC**CGGTGTACGTGGGGCCGCCCAAGGTCTCCACCTGCCTCTGCCGCCAGGCCCTCTTTCCCTCTGCTTCACAATC 3'  
king cobra 5' GCTTCTGCAGTG**TCTT**CTCCTATGTTGGAGTCCCAACCGAGCTGAGGTGTCTTTTCTGCCTGGCCAGGTACAGCCTCTGCTTCACCATC 3'

Human 5' TGCATCTCCTGTATCGCCGTGCGTTCTTTCCAGATCGTCTGCGCCTTCAAGATGGCCAGCCGCTTCCCACGCGCCTACAGCTACTGGGTC 3'  
king cobra 5' TGCCTTGCCTGCGCTGCGATCCGTTCCATCCGGATCCTCTGCGCTTTCAAGATGGTGGCCTGGCTGCCTGCAACCTTTCATCTCCTGGTCC 3'

Human 5' CGCTACCAGGGGCCCTACGTCTCTATGGCATTTATCACGGTACTCAAAA**T**GGTCATTGTGGTAATTGGCAT**TC**TGGCCACGGGCCTCA 3'  
king cobra 5' ACGTCCAAAAGGGCAGCGGGTTTTCCTCGCCACCATTTCCGCCATCAAAA**GGT**GGCCACCGTGATACTCAACCT**TCAT**TACCGCTCCCCGAA 3'

Human 5' GTCCCACCAC**CC**CGTACTGAC**CCCG**GATGACCCC---AAGATCACAATTTGTCTCCTGTAA**CCCG**AACTACCGCAACAGCCTGCTGTTCAAC 3'  
king cobra 5' GCCCGTCCAG**GGT**GCCTTAAT**G--**GGTAACCCGGCCGAGCTTTCCCTGACTTGTCA**CAAC**---GGCGACCTGTCCGTGGTTGTGCTCAAC 3'

Human 5' ACCAGCCTGGACCTGCTGCTCTCAGTGGTGGGTTTTCAGCTTCGCCTACATGGGCAAAGAGCTGCCCACTACAACGAGGCCAAGTTC 3'  
king cobra 5' CATCTCTTTGACATGGTCCCTCTCCTCCCTGGGCTTCTGCTTGGCCTATGCGGGGAAGGTGTTGCCAAAGAGCTACAGTGAAACCAAGTTC 3'

Human 5' ATCACCTC**AGCATGACCT**TCTATTTACCTCATCCGTC 3'  
king cobra 5' ATCTCCATCA**-----**TCCTGCTTCAGCTCCTGGGTG 3'

*Tas1r2* Exon 6

**Human** (1780) 5' CCCATAGTTCGCTCGGCTGGGGGCCCCATGTGCTTCCTGATG-CTGACACTGCTGCTGGT 3'  
**brown spotted pit viper** 5' CTGGTGGTGAGATCGGCCGGTGGCAGGCTGTGTTTCCTCATGTCCTCCCTTGTCTTC 3'

**Human** 5' GGCATACATGGTGTGTC-CCGGTGTACGTGGGGCCGC-CCAAGGTCTCCACCTGCCTCTGCCG 3'  
**brown spotted pit viper** 5' GGCTTCTGCAGTG-TCTTCTCCTATGTGGGGTC-C-CCACCGAGCTGAGATGTCTCTTCCG 3'

**Human** 5' CCAGGCCCTCTTTCCCCTCTGCTTCACAATC 3'  
**brown spotted pit viper** 5' CCTGGCCGGCTTCACCGTCTGCACCACCGTC 3'

*Tas1r3* Exon 1

**Chicken** (1) 5' ATGATCCCC-TGGGTGCTGCTGTGTATGAGCTTCGGTTGCGCAGCAGCCCTGAAGCCCAGC 3'  
**speckled rattlesnake** 5' ATGATATTT--GTTAGTGGTCAGGTTTGCTTTCAATGGTGCCGTAGCCCTGCAACACAAC 3'

**Chicken** 5' TGCCTCTCGGCTCAGTTTAGGAGGCCTGGTGACTACATCATTGGAGGCCTGTTCCCTTTT 3'  
**speckled rattlesnake** 5' TGCTTGTCTTCCCAGTTTAGAAGGCCTGGAGACTACGTCTTGGGTGGGCTGTTCCCATTC 3'

**Chicken** 5' GGGATGGACACCATCAACCTGAC-AGCACGATCAGAGCCCACCTTAATCGTGTGTGAA 3'  
**speckled rattlesnake** 5' AGAATTGGCACTACCAAGCTGTCCAGCCAGACTCTGCCAGAGCTTCACAAC-TGTGGG 3'
